# Supplementary figures and images for: Comparison of Multiple-Locus Variable-Number Tandem Repeat Analysis Profiles of Enteropathogenic Yersinia spp. Obtained from Humans, Domestic Pigs, Wild Boars, Rodents, Pork and Dog Food
Source: MDPI journal article supplement (doi:10.3390/ani13193055), 2023-09-29

1 43-13\_B05.fsa

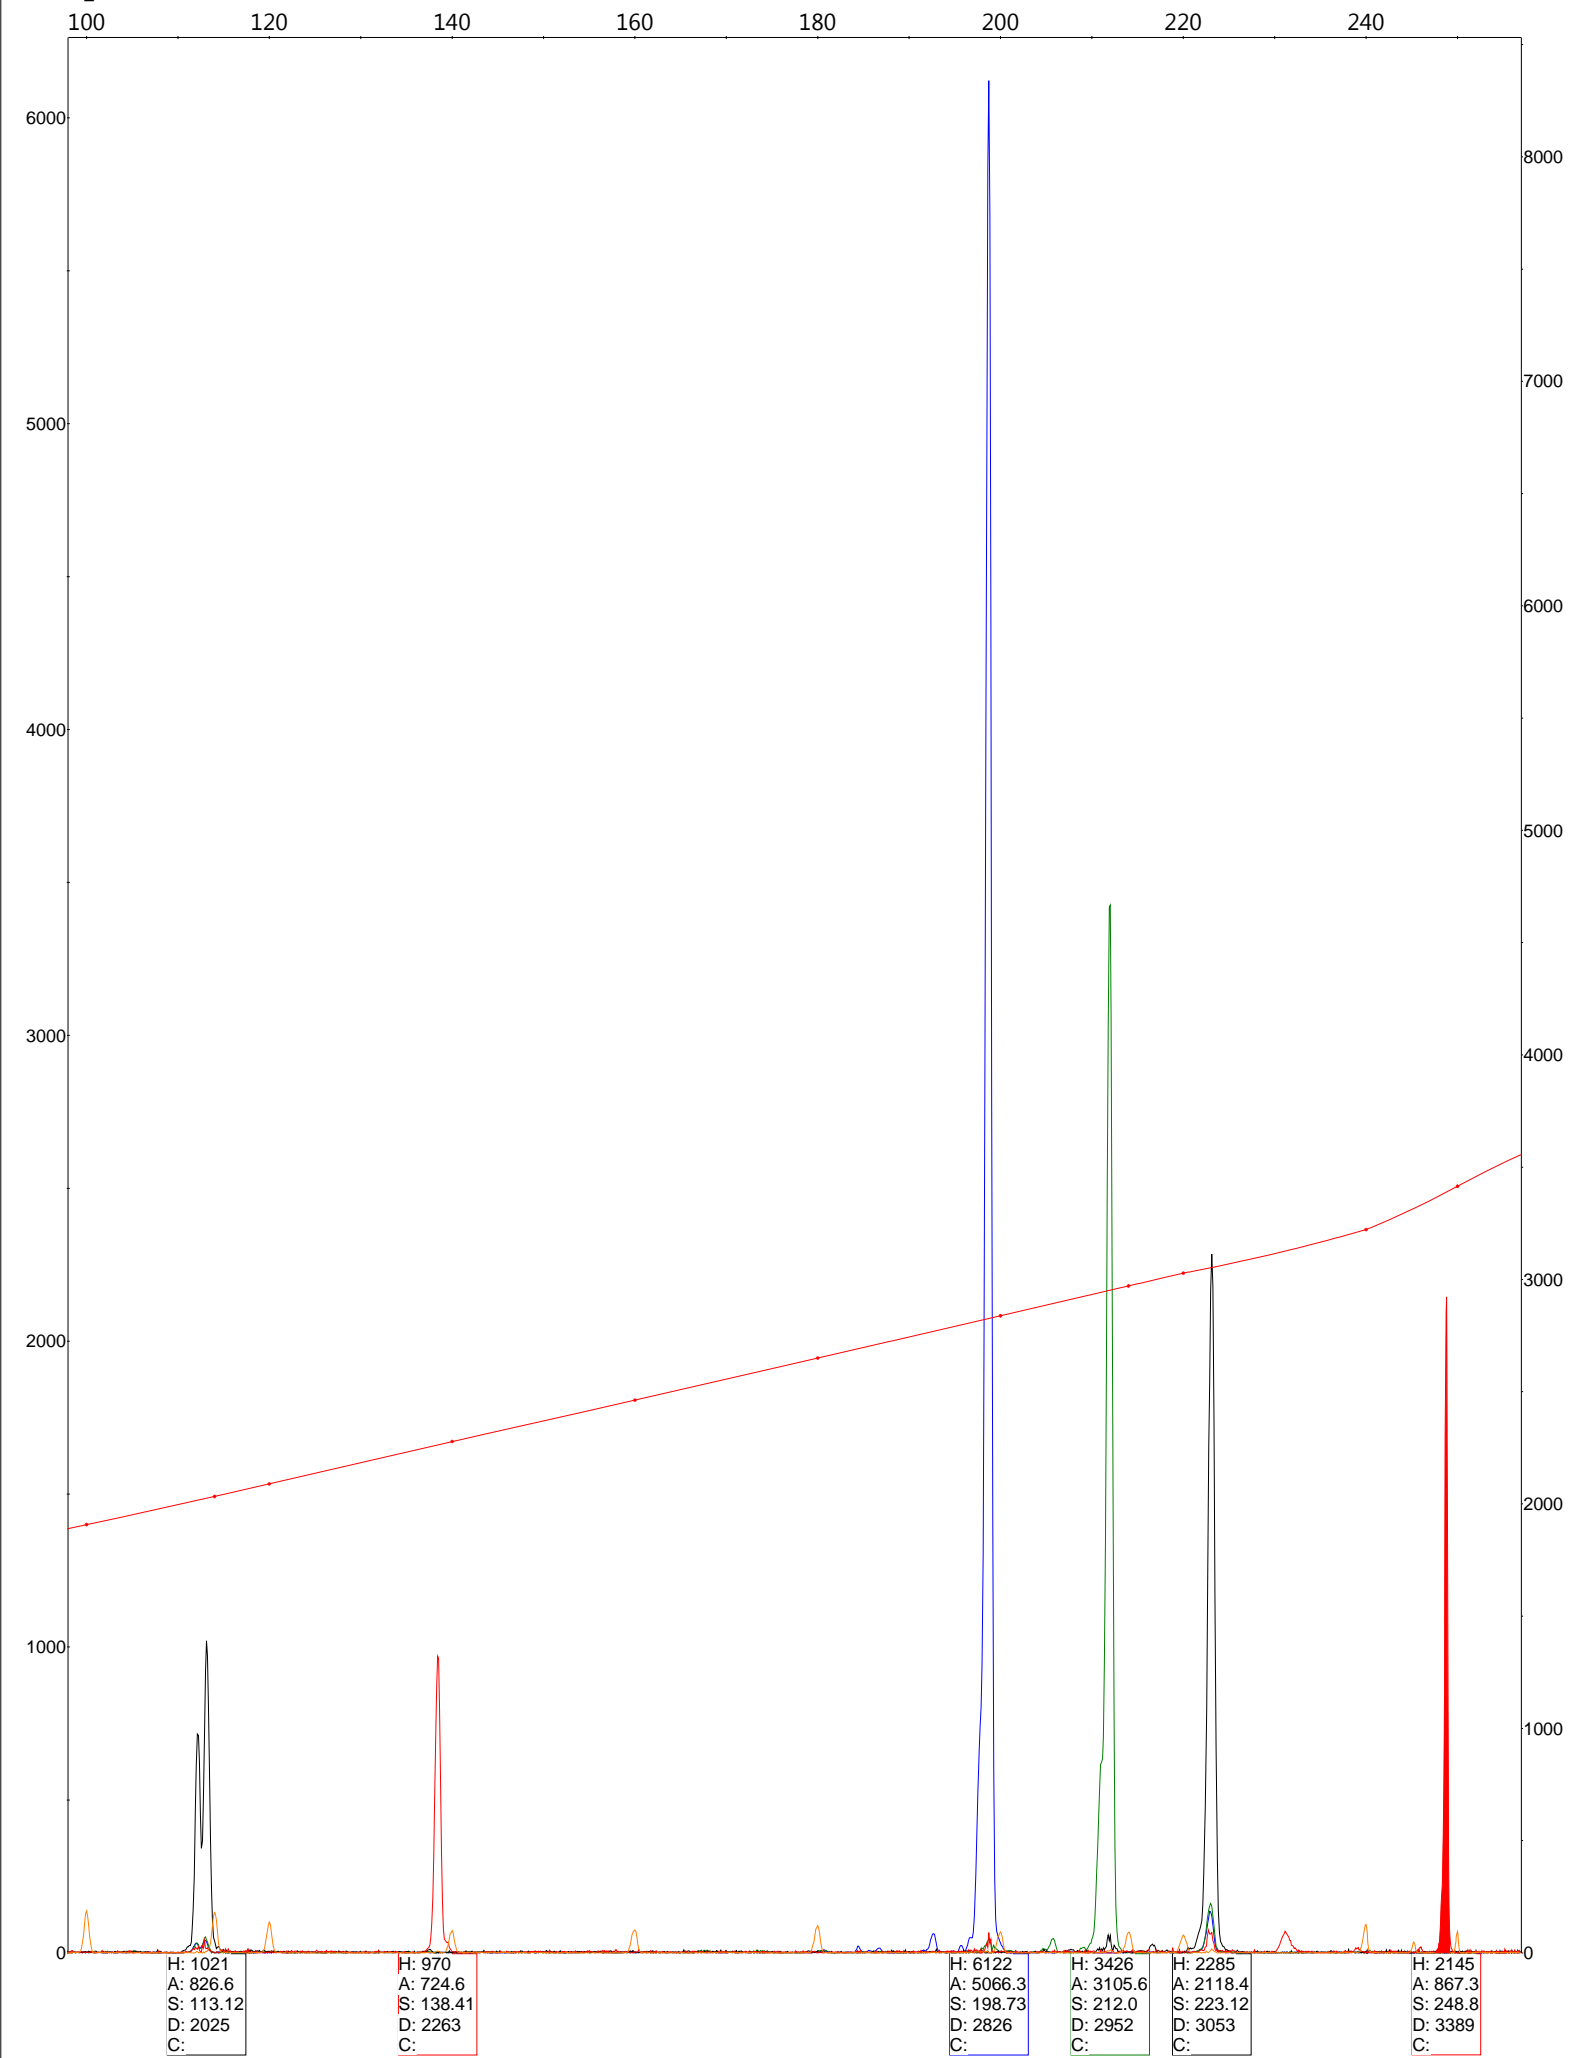

***Legend for Plot 1***

[illegible]

Supplement: s1 [file s1]
